# Supplementary material for: Shape, Microstructure, and Chemical Composition of Pearls from the Freshwater Clam Diplodon chilensis Native to South America
Source: MDPI journal article supplement (doi:10.3390/ani13132231), 2023-07-07
Supplement: s1 [file s1]

**Shape, microstructure and chemical composition of pearls produced by a freshwater clam native to South America**

**Gonzalo A. Collado<sup>\*</sup>, Moisés A. Valladares, Cristian Suárez, Mathias Seguel and Gerardo Cabello-Guzmán**

Departamento de Ciencias Básicas, Facultad de Ciencias, Universidad del Bío-Bío, Avenida Andrés Bello 720, Chillán, Chile

\* Corresponding author. E-mail address: gcollado@ubiobio.cl (G.A. Collado).

**Table S1.** Pearls found in *Diplodon chilensis* from southern Chile.

| Lake       | Individual | Shell length | Sex | Pearl size (um) |
|------------|------------|--------------|-----|-----------------|
| Villarrica | 4          | 52.1         | F   | 200             |
|            | 12         | 55.9         | M   | 791             |
|            | 7          | 46.1         | i   | 556             |
|            | 8          | 47.2         | M   | 1900            |
|            | 9          | 51.9         | F   | 900             |
|            | 14         | 55.7         | M   | Not measured    |
|            | 15         | 46,1         | F   | 556             |
|            | 17         | 48.3         | F   | Not measured    |
|            | 34         | 43,3         | M   | 478; 481        |
| Caburgua   | 21         | 65.6         | M   | 924             |

M: male; F: female; i: indeterminate.

### Energy-dispersive X-ray spectroscopy (EDX) analysis coupled to SEM (3 individuals)

**Table S2.** EDX analysis in a pearl of *Diplodon chilensis* from Lake Villarrica (individual 8, 1 in Table 1).

| Element    | At. No. | Netto | Mass [%]     | Mass Norm. [%] | Atom [%]      | abs. error [%]<br>(1 sigma) | rel. error [%]<br>(1 sigma) |
|------------|---------|-------|--------------|----------------|---------------|-----------------------------|-----------------------------|
| Oxygen     | 8       | 23090 | 41.99        | 44.29          | 50.47         | 5.33                        | 12.69                       |
| Calcium    | 20      | 73734 | 31.23        | 32.95          | 14.99         | 0.96                        | 3.08                        |
| Carbon     | 6       | 22816 | 21.57        | 22.76          | 34.54         | 2.75                        | 12.76                       |
| <b>Sum</b> |         |       | <b>94.79</b> | <b>100.00</b>  | <b>100.00</b> |                             |                             |

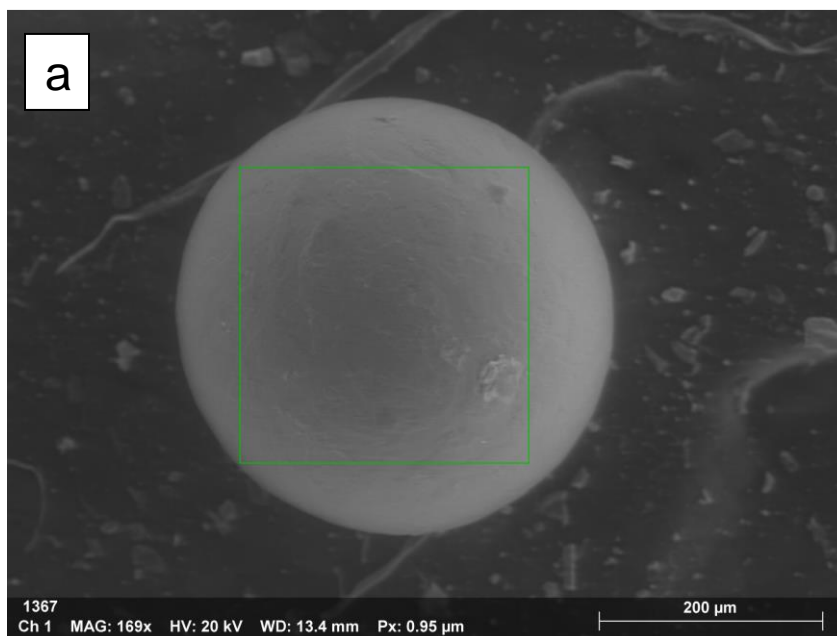

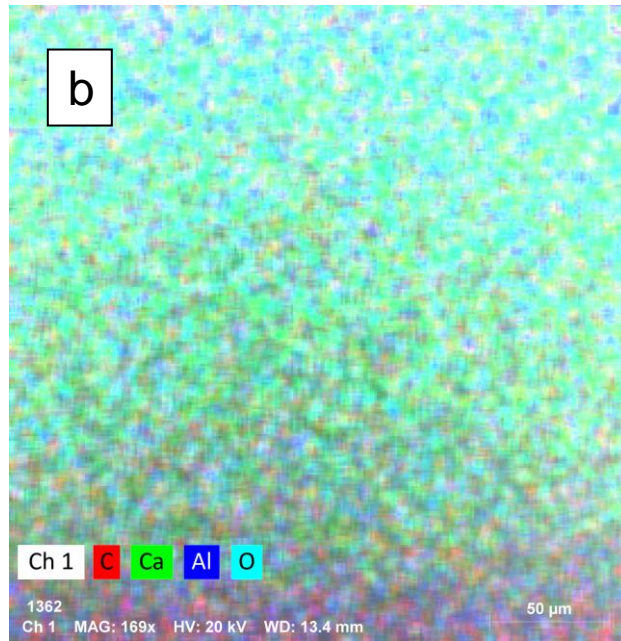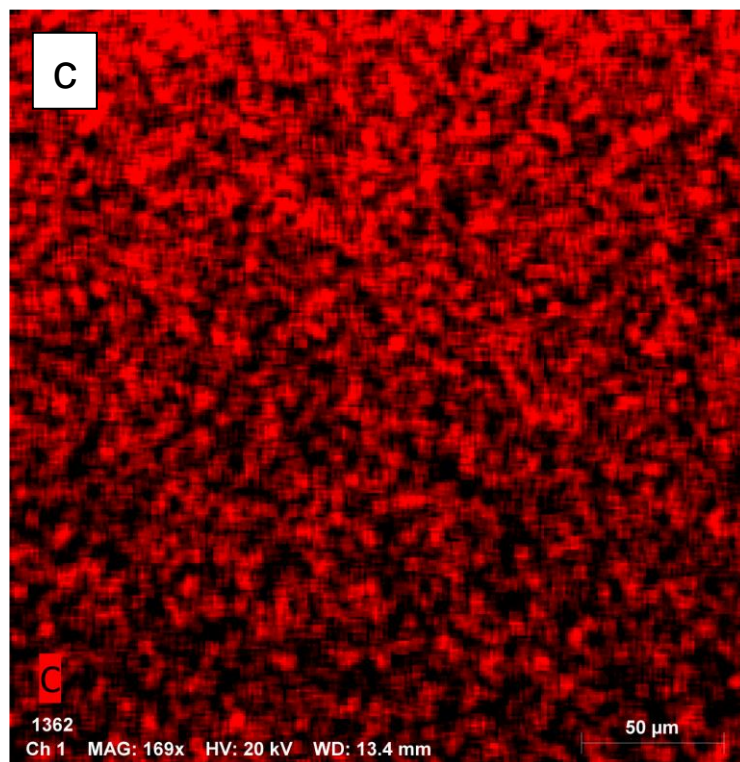

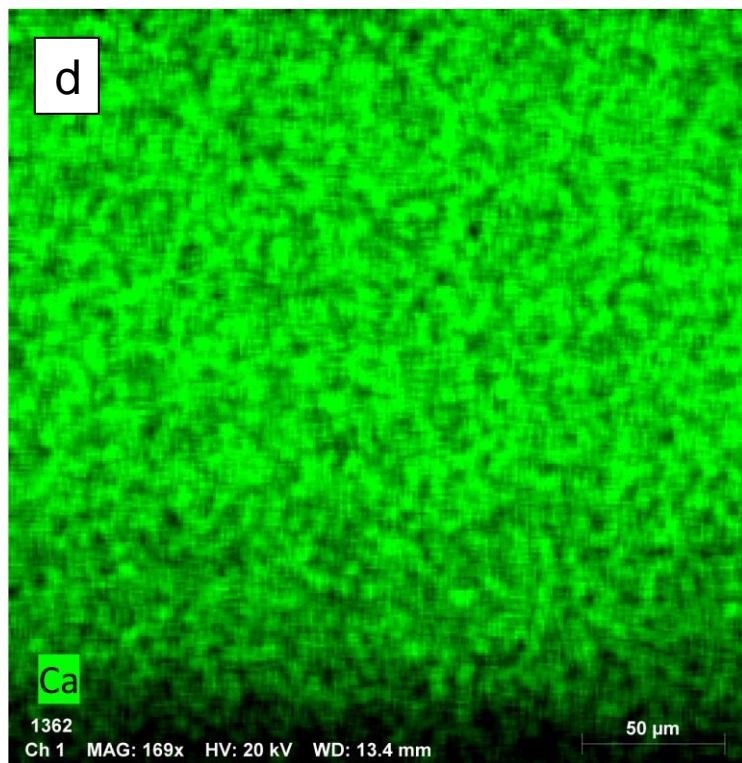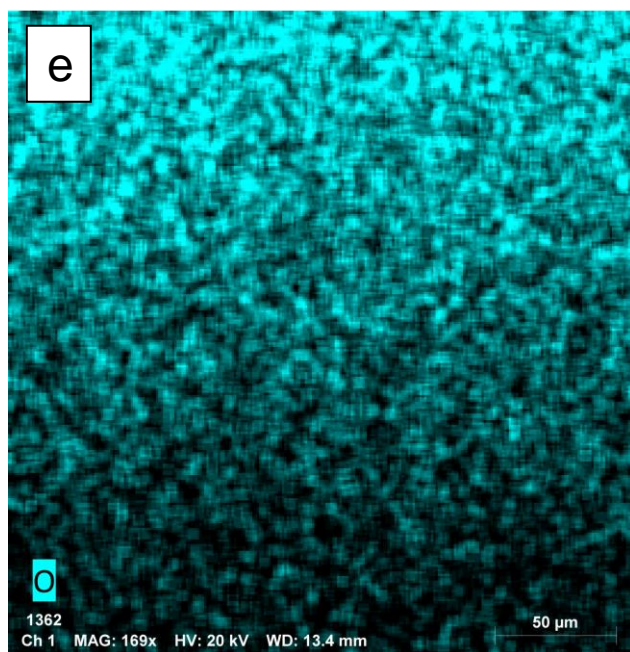

f

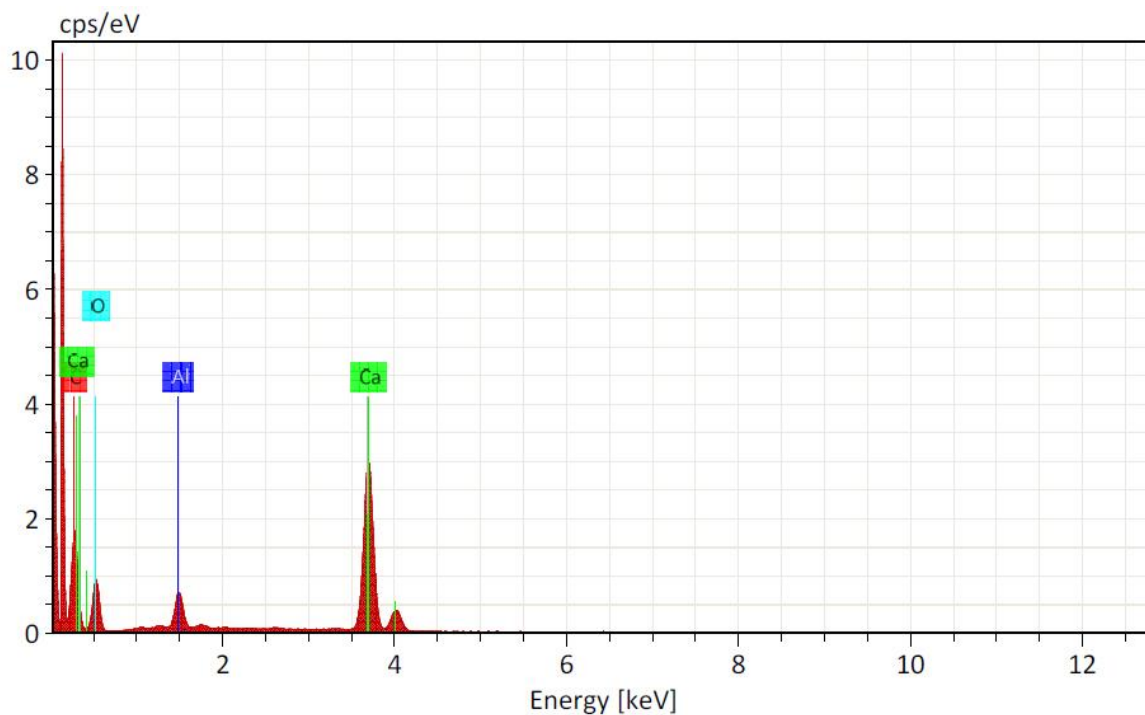

**Figure S1.** SEM-EDX of the pearl surface (a) of *Diplodon chilensis* from Lake Villarrica (individual 4). Presence of elements (C, Ca and O<sub>2</sub>) on the pearl surface (b). (c), while elemental mapping is shown in colors: carbon (red) (d), calcium (green) (e) and oxygen (blue). Picks of elements are shown in the EDX spectra (f).

**Table S3.** EDX analysis in a pearl of *Diplodon chilensis* from Lake Villarrica (individual 12, 2 in Table 1).

| Element    | At. No. | Netto | Mass [%]      | Mass Norm. [%] | Atom [%]      | abs. error [%]<br>(1 sigma) | rel. error [%]<br>(1 sigma) |
|------------|---------|-------|---------------|----------------|---------------|-----------------------------|-----------------------------|
| Oxygen     | 8       | 30788 | 41.88         | 39.35          | 40.30         | 5.17                        | 12.34                       |
| Carbon     | 6       | 58557 | 38.86         | 36.51          | 49.82         | 4.55                        | 11.72                       |
| Calcium    | 20      | 79893 | 25.69         | 24.14          | 9.87          | 0.80                        | 3.09                        |
| <b>Sum</b> |         |       | <b>106.44</b> | <b>100.00</b>  | <b>100.00</b> |                             |                             |



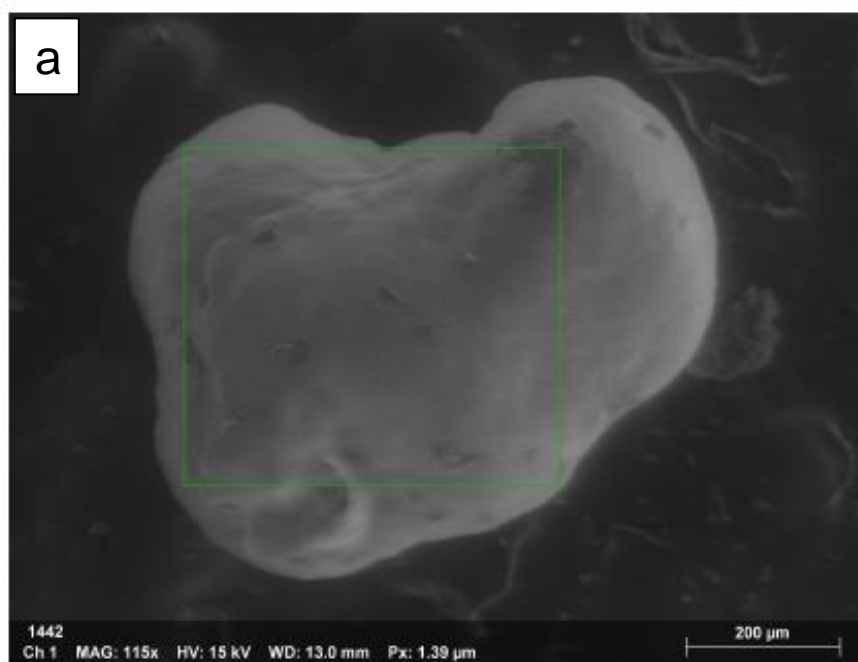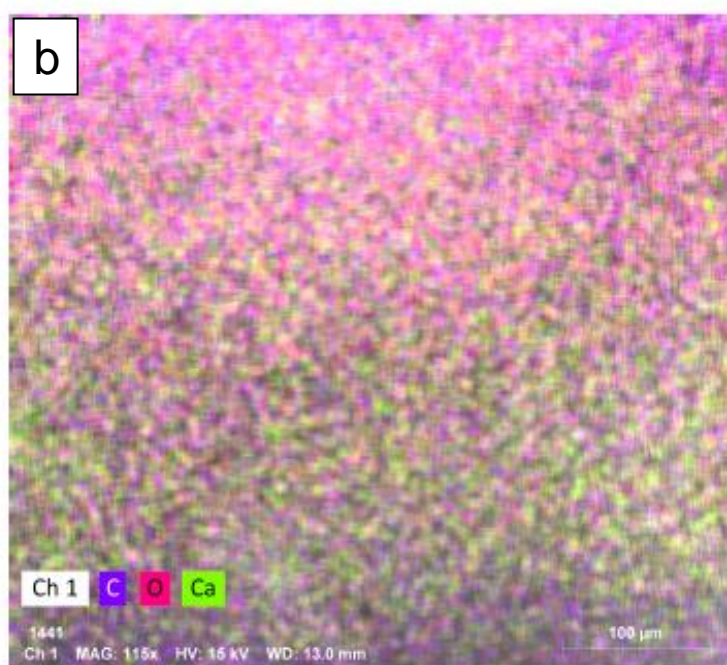

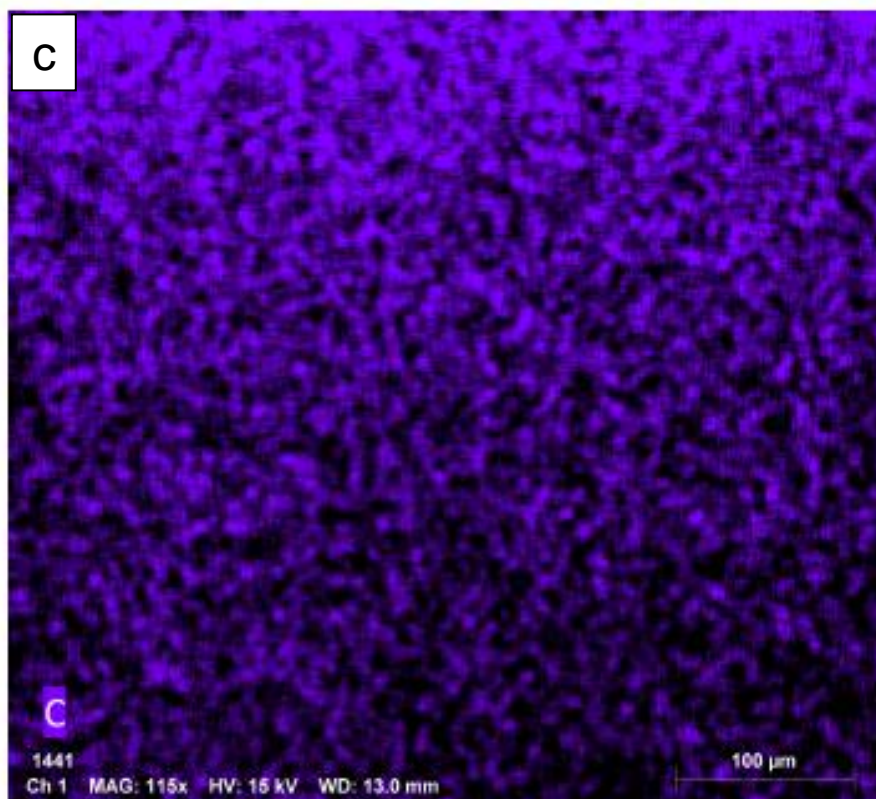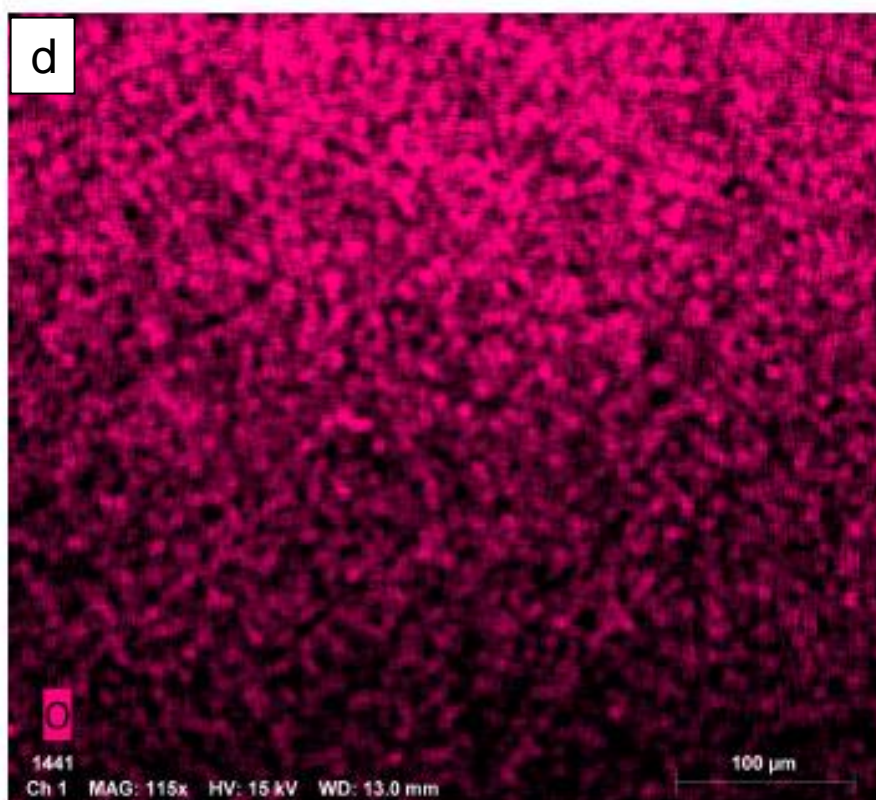

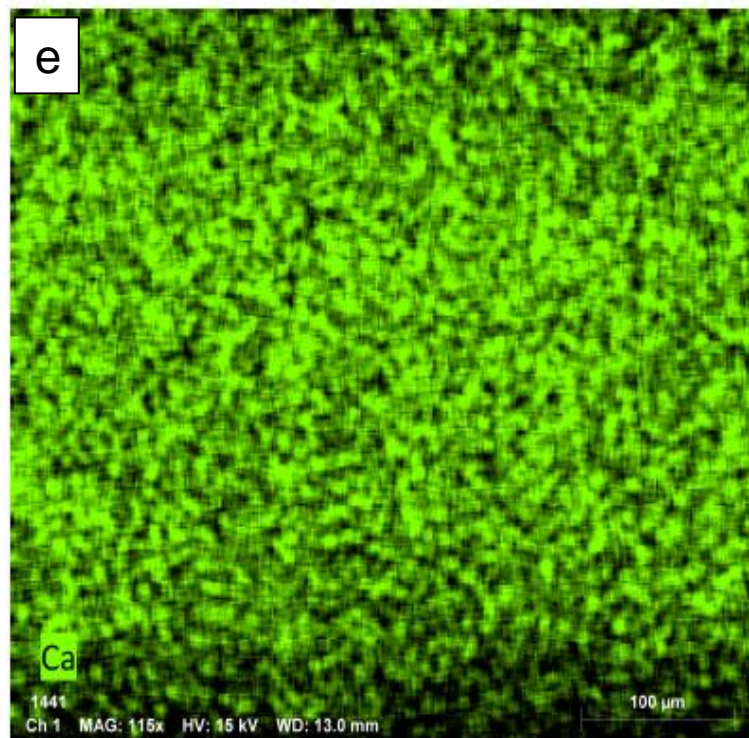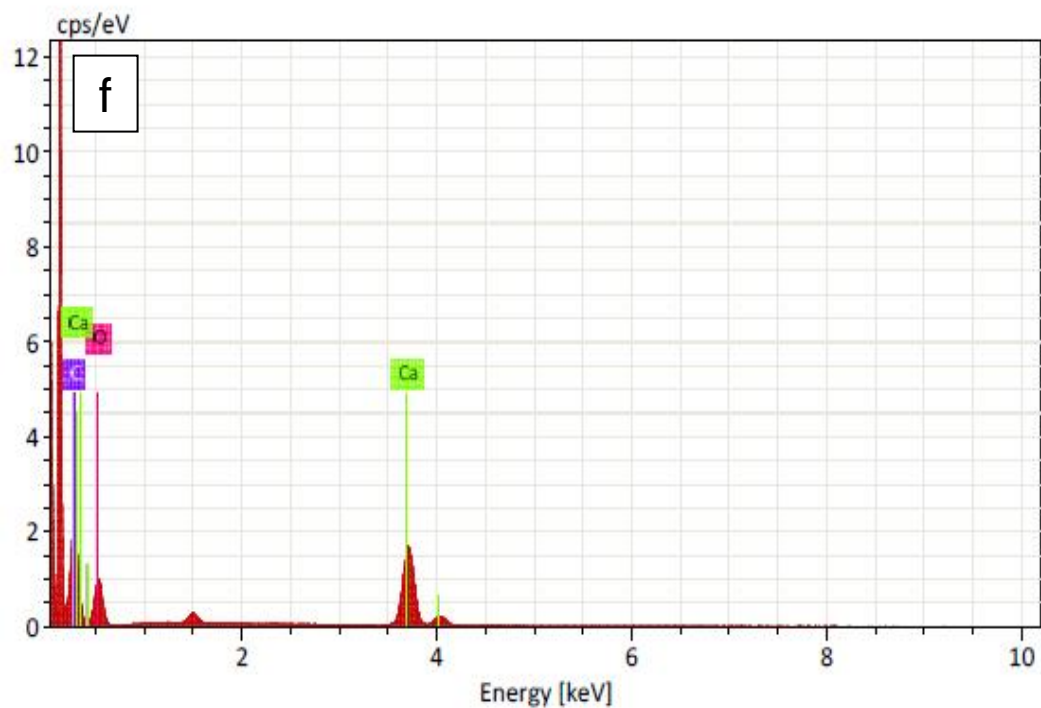

**Figure S2.** SEM-EDX of the pearl surface (a) of *Diplodon chilensis* from Lake Villarrica (individual 12). Presence of elements (C, O<sub>2</sub> and Ca) (b) on the pearl surface. Elemental mapping is shown in colors: carbon (violet) (c), oxygen (pink) (d) and calcium (green) (e). Picks of elements are shown in the EDX spectra (f).



**Table S4.** EDX analysis in a pearl of *Diplodon chilensis* from Lake Caburgua (individual 21, 9 in Table 1).

| Element | At. No. | Netto      | Mass [%]      | Mass Norm. [%] | Atom [%]      | abs. error [%]<br>(1 sigma) | rel. error [%]<br>(1 sigma) |
|---------|---------|------------|---------------|----------------|---------------|-----------------------------|-----------------------------|
| Oxygen  | 8       | 26691      | 45.42         | 42.85          | 45.86         | 5.68                        | 12.50                       |
| Carbon  | 6       | 36008      | 31.56         | 29.78          | 42.45         | 3.85                        | 12.19                       |
| Calcium | 20      | 71006      | 29.00         | 27.36          | 11.69         | 0.90                        | 3.09                        |
|         |         | <b>Sum</b> | <b>105.98</b> | <b>100.00</b>  | <b>100.00</b> |                             |                             |

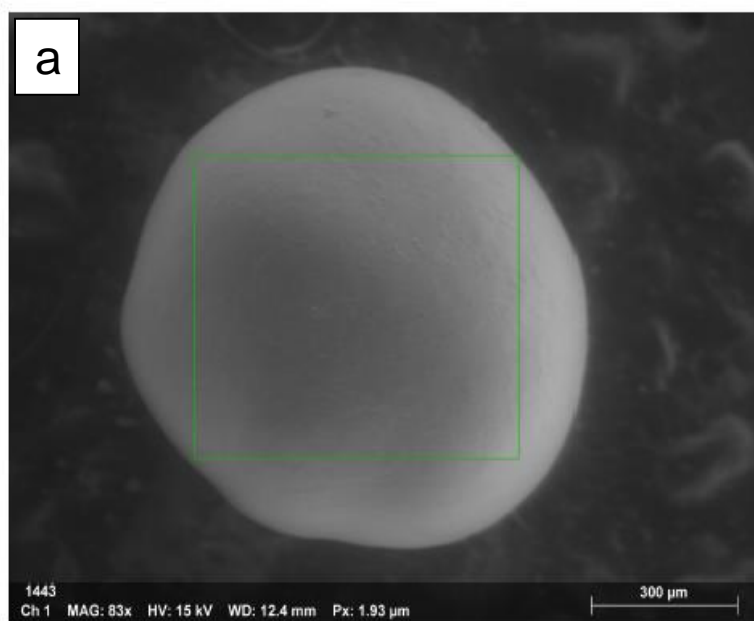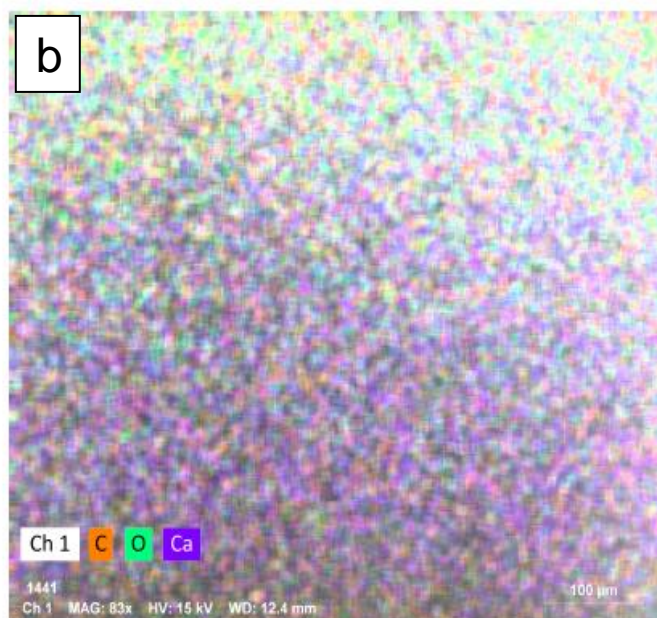

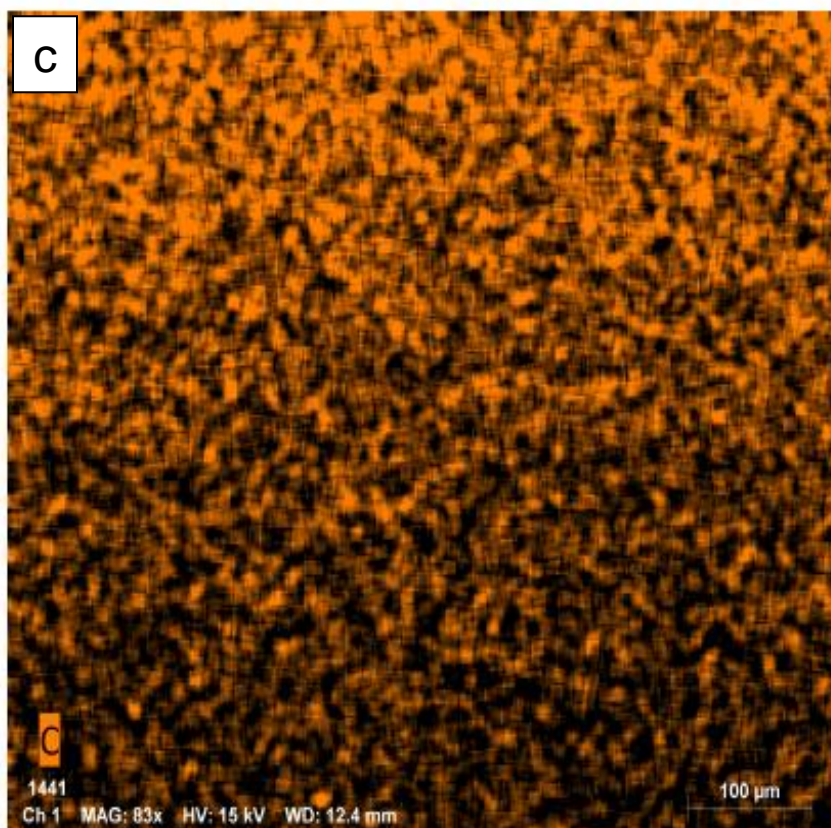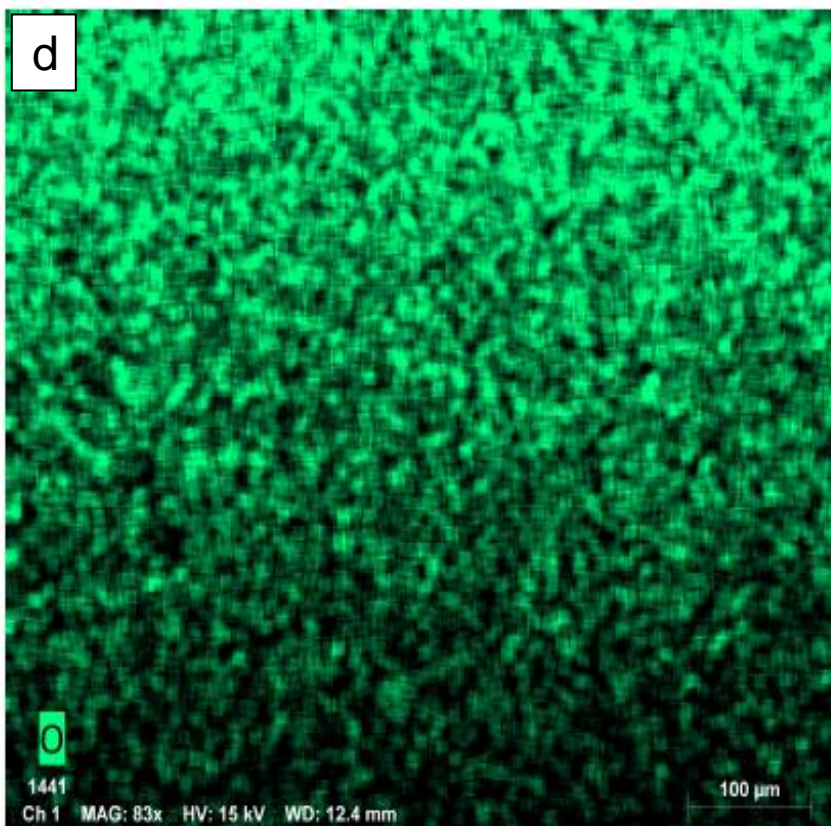

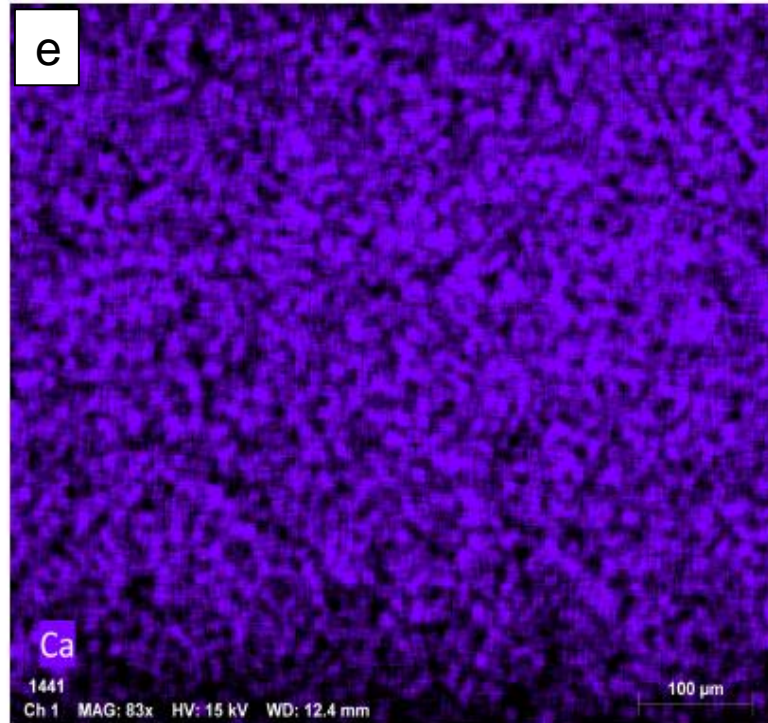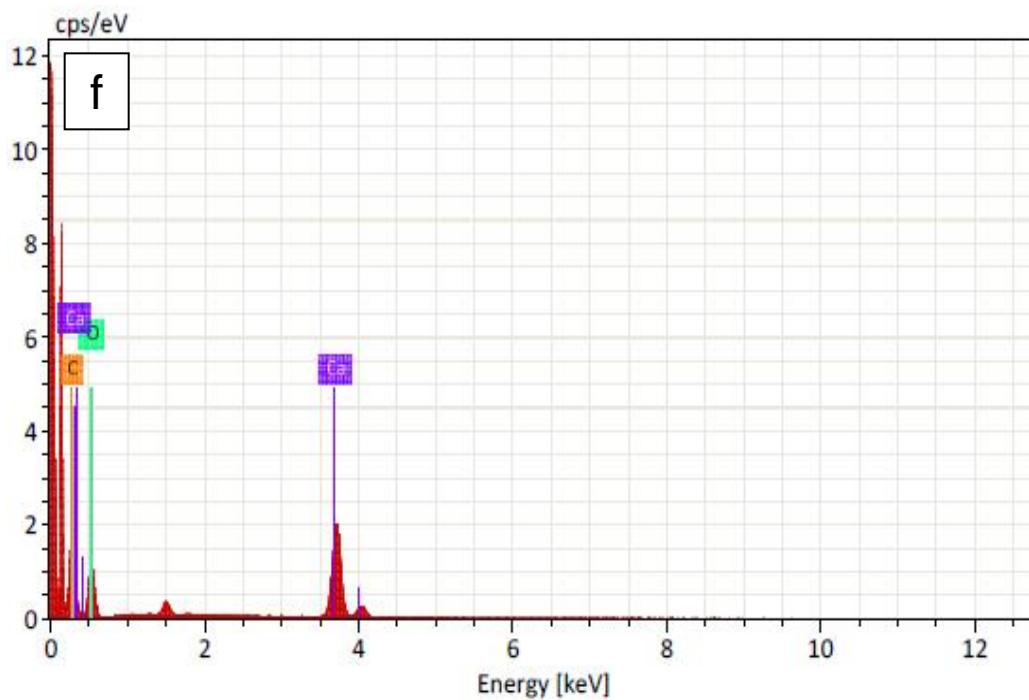

**Figure S3.** SEM-EDX of the pearl surface (a) of *Diplodon chilensis* from Lake Caburgua (individual 21). Presence of elements (C, O<sub>2</sub> and Ca) on the pearl surface (b). Elemental mapping is shown in colors: carbon (orange) (c), oxygen (green) (d) and calcium (violet) (e). Picks of elements are shown in the EDS spectra (f).
